# Supplementary material
Source: Springer Nature journal article supplement (https://www.springermedizin.de/resource/supplementary/12889_2008_1343_MOESM1_ESM.pdf/9502998)
Supplement: MOESM1 [file 9502998]

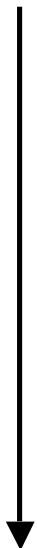

- **National**
  - **Teaching**
  - **General**
  - **Base**
  - **District**
  - **Peripheral Units**
  - **Village/Rural**
  - **Central Dispensaries and maternal homes (no in-patient care)**
- Hospitals considered as rural hospitals and included in this study. All these hospitals have non-specialized doctors**
